# Supplementary material for: Enhanced HDO activity of Ni2P promoted with noble metals
Source: Royal Society of Chemistry journal article supplement (doi:10.1039/c6cy00639f), 2016-01-01
Supplement: c6cy00639f1.pdf [file c6cy00639f1.pdf]

## Enhanced HDO activity of Ni<sub>2</sub>P promoted with noble metals

J.A. Cecilia, A. Infantes-Molina, J. Sanmartín-Donoso, E. Rodríguez-Aguado, Daniel Ballesteros-Plata and E. Rodríguez-Castellón

### SUPPLEMENTARY INFORMATION

#### 1. XRD

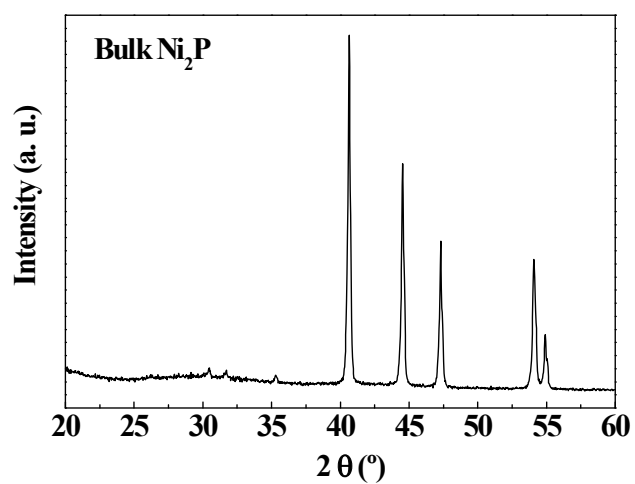

Fig S1. XRD of Bulk Ni<sub>2</sub>P sample

#### 2. XPS

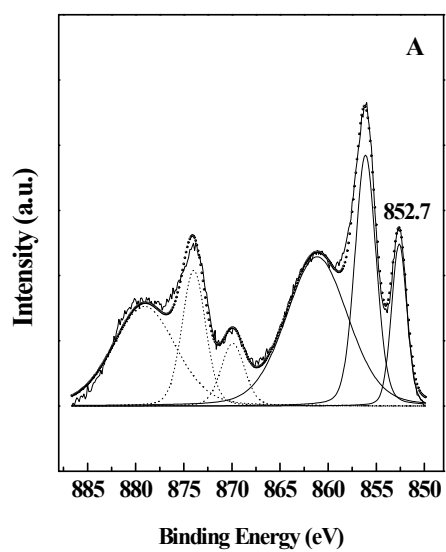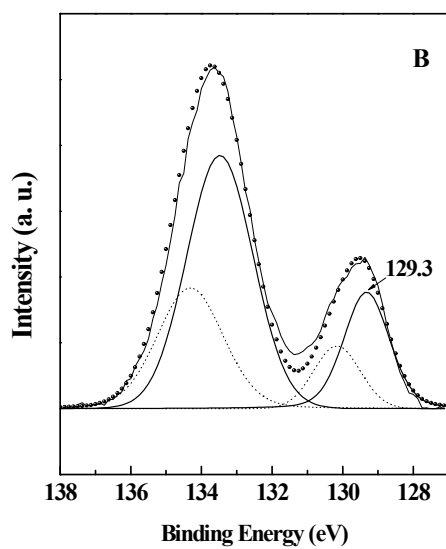

Figure S2. Ni 2p (A) and P 2p (B) core level spectra of bulk Ni<sub>2</sub>P phase

### Ir 4f core level spectra

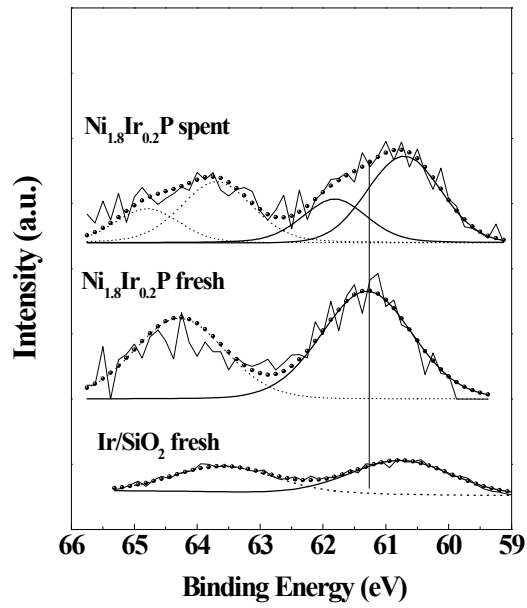

Figure S3. Ir 4f core level spectra

### Ru 3p<sub>3/2</sub> core level spectra

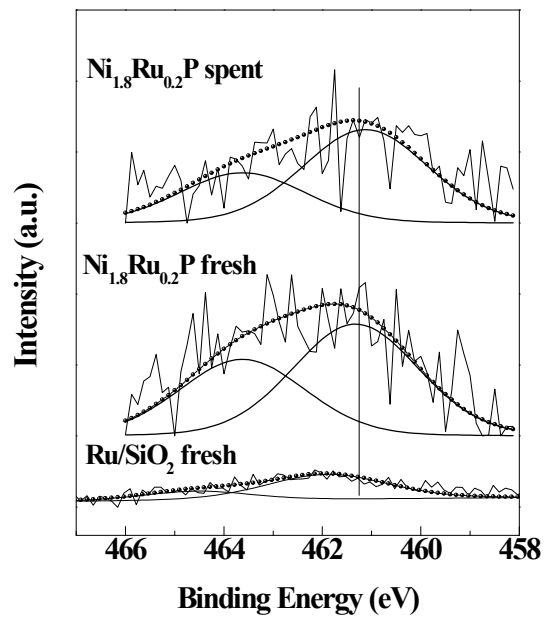

Figure S4. Ru 3p<sub>3/2</sub> core level spectra

**Rh 3d core level spectra**

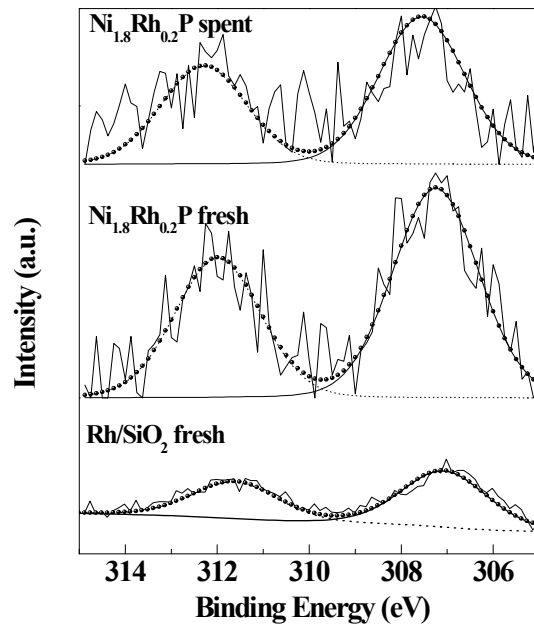

Figure S5. Rh 3d core level spectra
